# Supplementary material for: Genome assembly of Luehdorfia taibai, an endangered butterfly endemic to Qinling Moutains in China with extremely small populations
Source: Frontiers journal article supplement (doi:10.3389/fevo.2022.955246), 2022-08-04
Supplement: Table_4.XLSX [file Table_4.XLSX]

## Sheet: TBtools147707046211086645.enric
Class	GO_Name	GO_ID	GO_Level	P_value	EnrichmentScore	HitsGenesCountsInSelectedSet	HitsGenesCountsInBackground	AllGenesCountsInSelectedSet	AllGenesCountsInBackground	GenesOfSelectedSetInGOterm	corrected p-value(BH method)
Biological process	reproduction	GO:0000003	2	0	5.01843	41	53	823	5339	HFDGene05179,HFDGene08696,HFDGene08697,HFDGene08698,HFDGene08699,HFDGene10191,HFDGene10194,HFDGene10192,HFDGene10193,HFDGene10198,HFDGene10199,HFDGene10196,HFDGene10197,HFDGene08721,HFDGene08704,HFDGene08706,HFDGene08707,HFDGene08708,HFDGene08709,HFDGene08700,HFDGene08701,HFDGene08702,HFDGene08703,HFDGene08715,HFDGene08719,HFDGene08710,HFDGene08711,HFDGene08712,HFDGene08713,HFDGene10208,HFDGene10…	0
Biological process	multi-organism process	GO:0051704	2	0	4.38099	52	77	823	5339	HFDGene05179,HFDGene08696,HFDGene08697,HFDGene08698,HFDGene08699,HFDGene01662,HFDGene10191,HFDGene10194,HFDGene10192,HFDGene10193,HFDGene10198,HFDGene10199,HFDGene10196,HFDGene10197,HFDGene08721,HFDGene08704,HFDGene08706,HFDGene08707,HFDGene08708,HFDGene08709,HFDGene08700,HFDGene08701,HFDGene08702,HFDGene08703,HFDGene08715,HFDGene08719,HFDGene08710,HFDGene08711,HFDGene08712,HFDGene08713,HFDGene10…	0
Biological process	reproductive process	GO:0022414	2	0	5.01843	41	53	823	5339	HFDGene05179,HFDGene08696,HFDGene08697,HFDGene08698,HFDGene08699,HFDGene10191,HFDGene10194,HFDGene10192,HFDGene10193,HFDGene10198,HFDGene10199,HFDGene10196,HFDGene10197,HFDGene08721,HFDGene08704,HFDGene08706,HFDGene08707,HFDGene08708,HFDGene08709,HFDGene08700,HFDGene08701,HFDGene08702,HFDGene08703,HFDGene08715,HFDGene08719,HFDGene08710,HFDGene08711,HFDGene08712,HFDGene08713,HFDGene10208,HFDGene10…	0
Cellular component	extracellular region	GO:0005576	2	3.77476e-14	2.53105	64	173	436	2983	HFDGene09573,HFDGene10576,HFDGene08254,HFDGene09568,HFDGene07335,HFDGene07336,HFDGene07337,HFDGene04732,HFDGene01662,HFDGene03843,HFDGene03439,HFDGene03437,HFDGene03436,HFDGene03424,HFDGene11542,HFDGene11537,HFDGene10668,HFDGene15089,HFDGene03995,HFDGene03997,HFDGene00458,HFDGene00459,HFDGene05784,HFDGene02246,HFDGene13364,HFDGene05719,HFDGene17366,HFDGene12508,HFDGene08499,HFDGene08460,HFDGene08…	2.76816e-12
Molecular function	transporter activity	GO:0005215	2	8.61533e-14	1.75821	153	557	1255	8033	HFDGene08249,HFDGene01625,HFDGene01626,HFDGene10565,HFDGene00738,HFDGene08686,HFDGene11868,HFDGene10534,HFDGene07369,HFDGene06008,HFDGene06485,HFDGene14524,HFDGene12333,HFDGene12320,HFDGene12325,HFDGene12324,HFDGene12327,HFDGene12309,HFDGene12311,HFDGene12318,HFDGene02993,HFDGene12300,HFDGene12304,HFDGene01638,HFDGene01637,HFDGene00316,HFDGene01644,HFDGene03818,HFDGene02146,HFDGene15455,HFDGene15…	4.11382e-12
Molecular function	catalytic activity	GO:0003824	2	2.0054e-11	1.20027	643	3429	1255	8033	HFDGene12751,HFDGene01606,HFDGene10576,HFDGene12753,HFDGene12752,HFDGene12758,HFDGene12757,HFDGene03804,HFDGene03805,HFDGene09105,HFDGene02951,HFDGene14924,HFDGene14905,HFDGene06046,HFDGene05194,HFDGene12719,HFDGene06059,HFDGene07387,HFDGene02930,HFDGene07381,HFDGene07383,HFDGene10540,HFDGene02929,HFDGene02928,HFDGene14903,HFDGene14900,HFDGene08208,HFDGene05171,HFDGene10535,HFDGene05189,HFDGene08…	6.04785e-10
Biological process	multicellular organismal process	GO:0032501	2	4.90422e-11	2.21932	65	190	823	5339	HFDGene09568,HFDGene05179,HFDGene11849,HFDGene11847,HFDGene08696,HFDGene08697,HFDGene08698,HFDGene08699,HFDGene06086,HFDGene05648,HFDGene14573,HFDGene10191,HFDGene10194,HFDGene10192,HFDGene10193,HFDGene10198,HFDGene10199,HFDGene10196,HFDGene10197,HFDGene14558,HFDGene15870,HFDGene08754,HFDGene08721,HFDGene08704,HFDGene08706,HFDGene08707,HFDGene08708,HFDGene08709,HFDGene08700,HFDGene08701,HFDGene08…	1.68429e-09
Biological process	developmental process	GO:0032502	2	3.92066e-10	2.50767	46	119	823	5339	HFDGene08696,HFDGene08697,HFDGene08698,HFDGene08699,HFDGene10191,HFDGene10194,HFDGene10192,HFDGene10193,HFDGene10198,HFDGene10199,HFDGene10196,HFDGene10197,HFDGene08754,HFDGene08721,HFDGene08704,HFDGene08706,HFDGene08707,HFDGene08708,HFDGene08709,HFDGene08700,HFDGene08701,HFDGene08702,HFDGene08703,HFDGene08715,HFDGene08718,HFDGene08719,HFDGene08710,HFDGene08711,HFDGene08712,HFDGene08713,HFDGene10…	1.2673e-08
Molecular function	antioxidant activity	GO:0016209	2	3.72512e-05	2.8448	16	36	1255	8033	HFDGene05656,HFDGene05657,HFDGene13295,HFDGene09213,HFDGene09210,HFDGene09211,HFDGene09212,HFDGene11545,HFDGene09209,HFDGene09257,HFDGene09258,HFDGene16915,HFDGene05933,HFDGene09004,HFDGene17096,HFDGene06856,	0.000790553
Cellular component	membrane part	GO:0044425	2	4.69409e-05	1.27744	163	873	436	2983	HFDGene06042,HFDGene00749,HFDGene11868,HFDGene07369,HFDGene06008,HFDGene09516,HFDGene08670,HFDGene14522,HFDGene14524,HFDGene12333,HFDGene12320,HFDGene12325,HFDGene12324,HFDGene12327,HFDGene12309,HFDGene12311,HFDGene12318,HFDGene02993,HFDGene12300,HFDGene12304,HFDGene00316,HFDGene03825,HFDGene03818,HFDGene05655,HFDGene02146,HFDGene07834,HFDGene01272,HFDGene15446,HFDGene17614,HFDGene02588,HFDGene14…	0.00147528
Cellular component	membrane	GO:0016020	2	7.33326e-05	1.18987	232	1334	436	2983	HFDGene01606,HFDGene01625,HFDGene01626,HFDGene10565,HFDGene08220,HFDGene00738,HFDGene06042,HFDGene00749,HFDGene08686,HFDGene11868,HFDGene10535,HFDGene07369,HFDGene06008,HFDGene09516,HFDGene08670,HFDGene14530,HFDGene14522,HFDGene14524,HFDGene12333,HFDGene12320,HFDGene12325,HFDGene12324,HFDGene12327,HFDGene12309,HFDGene12311,HFDGene12318,HFDGene02993,HFDGene12300,HFDGene12304,HFDGene01638,HFDGene01…	0.00201665
Biological process	localization	GO:0051179	2	0.000315022	1.24517	181	943	823	5339	HFDGene08249,HFDGene01625,HFDGene10565,HFDGene00738,HFDGene06042,HFDGene00749,HFDGene08686,HFDGene11868,HFDGene10534,HFDGene11849,HFDGene11847,HFDGene07369,HFDGene06008,HFDGene06485,HFDGene14524,HFDGene12333,HFDGene12320,HFDGene12325,HFDGene12324,HFDGene12327,HFDGene12309,HFDGene12311,HFDGene12318,HFDGene02993,HFDGene12300,HFDGene12304,HFDGene01638,HFDGene06086,HFDGene00316,HFDGene01644,HFDGene03…	0.0072127
Molecular function	molecular transducer activity	GO:0060089	2	0.0011352	1.4732	58	252	1255	8033	HFDGene01606,HFDGene01625,HFDGene01626,HFDGene09516,HFDGene14524,HFDGene01638,HFDGene01637,HFDGene05655,HFDGene02146,HFDGene07834,HFDGene01272,HFDGene05648,HFDGene02588,HFDGene14573,HFDGene02592,HFDGene15870,HFDGene07438,HFDGene07001,HFDGene12807,HFDGene12809,HFDGene13329,HFDGene03523,HFDGene01791,HFDGene01790,HFDGene00472,HFDGene12415,HFDGene12400,HFDGene13375,HFDGene02205,HFDGene17707,HFDGene07…	0.0154874
Biological process	immune system process	GO:0002376	2	0.00204452	3.05282	8	17	823	5339	HFDGene00877,HFDGene09717,HFDGene13420,HFDGene13421,HFDGene10914,HFDGene10912,HFDGene10911,HFDGene10910,	0.0374488
Cellular component	extracellular region part	GO:0044421	2	0.00796138	2.02142	13	44	436	2983	HFDGene09573,HFDGene10576,HFDGene09568,HFDGene03439,HFDGene03437,HFDGene03436,HFDGene03995,HFDGene03997,HFDGene01473,HFDGene02439,HFDGene15701,HFDGene13155,HFDGene15309,	0.125107
Cellular component	supramolecular complex	GO:0099080	2	0.031939	2.17692	7	22	436	2983	HFDGene05193,HFDGene02549,HFDGene02550,HFDGene14558,HFDGene09774,HFDGene17003,HFDGene06861,	0.270253
Molecular function	structural constituent of chorion	GO:0005213	3	0	6.2278	36	37	1255	8033	HFDGene08696,HFDGene08697,HFDGene08698,HFDGene08699,HFDGene10191,HFDGene10194,HFDGene10192,HFDGene10193,HFDGene10198,HFDGene10199,HFDGene10196,HFDGene10197,HFDGene08721,HFDGene08704,HFDGene08706,HFDGene08707,HFDGene08708,HFDGene08709,HFDGene08700,HFDGene08701,HFDGene08702,HFDGene08703,HFDGene08715,HFDGene08719,HFDGene08710,HFDGene08711,HFDGene08712,HFDGene08713,HFDGene10208,HFDGene10202,HFDGene10…	0
Molecular function	oxidoreductase activity	GO:0016491	3	0	2.15654	188	558	1255	8033	HFDGene12751,HFDGene12753,HFDGene12752,HFDGene02951,HFDGene14924,HFDGene08208,HFDGene10993,HFDGene10992,HFDGene09176,HFDGene16717,HFDGene16714,HFDGene02559,HFDGene02558,HFDGene09182,HFDGene11000,HFDGene09169,HFDGene09168,HFDGene00323,HFDGene09130,HFDGene15809,HFDGene12788,HFDGene13636,HFDGene15810,HFDGene12789,HFDGene00785,HFDGene09111,HFDGene05656,HFDGene05657,HFDGene06992,HFDGene14597,HFDGene04…	0
Cellular component	external encapsulating structure	GO:0030312	3	0	6.38563	42	45	436	2983	HFDGene08696,HFDGene08697,HFDGene08698,HFDGene08699,HFDGene05656,HFDGene05657,HFDGene10191,HFDGene10194,HFDGene10192,HFDGene10193,HFDGene10198,HFDGene10199,HFDGene10196,HFDGene10197,HFDGene08721,HFDGene08704,HFDGene08706,HFDGene08707,HFDGene08708,HFDGene08709,HFDGene08700,HFDGene08701,HFDGene08702,HFDGene08703,HFDGene08715,HFDGene08719,HFDGene08710,HFDGene08711,HFDGene08712,HFDGene08713,HFDGene10…	0
Biological process	multicellular organismal reproductive process	GO:0048609	3	0	5.65908	41	47	823	5339	HFDGene05179,HFDGene08696,HFDGene08697,HFDGene08698,HFDGene08699,HFDGene10191,HFDGene10194,HFDGene10192,HFDGene10193,HFDGene10198,HFDGene10199,HFDGene10196,HFDGene10197,HFDGene08721,HFDGene08704,HFDGene08706,HFDGene08707,HFDGene08708,HFDGene08709,HFDGene08700,HFDGene08701,HFDGene08702,HFDGene08703,HFDGene08715,HFDGene08719,HFDGene08710,HFDGene08711,HFDGene08712,HFDGene08713,HFDGene10208,HFDGene10…	0
Biological process	anatomical structure formation involved in morphogenesis	GO:0048646	3	0	6.3209	38	39	823	5339	HFDGene08696,HFDGene08697,HFDGene08698,HFDGene08699,HFDGene10191,HFDGene10194,HFDGene10192,HFDGene10193,HFDGene10198,HFDGene10199,HFDGene10196,HFDGene10197,HFDGene08721,HFDGene08704,HFDGene08706,HFDGene08707,HFDGene08708,HFDGene08709,HFDGene08700,HFDGene08701,HFDGene08702,HFDGene08703,HFDGene08715,HFDGene08719,HFDGene08710,HFDGene08711,HFDGene08712,HFDGene08713,HFDGene10208,HFDGene10202,HFDGene10…	0
Biological process	multi-organism reproductive process	GO:0044703	3	0	5.65908	41	47	823	5339	HFDGene05179,HFDGene08696,HFDGene08697,HFDGene08698,HFDGene08699,HFDGene10191,HFDGene10194,HFDGene10192,HFDGene10193,HFDGene10198,HFDGene10199,HFDGene10196,HFDGene10197,HFDGene08721,HFDGene08704,HFDGene08706,HFDGene08707,HFDGene08708,HFDGene08709,HFDGene08700,HFDGene08701,HFDGene08702,HFDGene08703,HFDGene08715,HFDGene08719,HFDGene08710,HFDGene08711,HFDGene08712,HFDGene08713,HFDGene10208,HFDGene10…	0
Biological process	multicellular organism reproduction	GO:0032504	3	0	5.65908	41	47	823	5339	HFDGene05179,HFDGene08696,HFDGene08697,HFDGene08698,HFDGene08699,HFDGene10191,HFDGene10194,HFDGene10192,HFDGene10193,HFDGene10198,HFDGene10199,HFDGene10196,HFDGene10197,HFDGene08721,HFDGene08704,HFDGene08706,HFDGene08707,HFDGene08708,HFDGene08709,HFDGene08700,HFDGene08701,HFDGene08702,HFDGene08703,HFDGene08715,HFDGene08719,HFDGene08710,HFDGene08711,HFDGene08712,HFDGene08713,HFDGene10208,HFDGene10…	0
Molecular function	cofactor binding	GO:0048037	3	1.11022e-16	2.10996	119	361	1255	8033	HFDGene11420,HFDGene12753,HFDGene12752,HFDGene02951,HFDGene14924,HFDGene09176,HFDGene16717,HFDGene16714,HFDGene02559,HFDGene02558,HFDGene09182,HFDGene09169,HFDGene09164,HFDGene09168,HFDGene09130,HFDGene12788,HFDGene13636,HFDGene15810,HFDGene12789,HFDGene09111,HFDGene05656,HFDGene05657,HFDGene05638,HFDGene05636,HFDGene14597,HFDGene04764,HFDGene04765,HFDGene04763,HFDGene04767,HFDGene16757,HFDGene02…	1.59039e-14
Biological process	developmental process involved in reproduction	GO:0003006	3	1.11022e-16	5.88378	39	43	823	5339	HFDGene08696,HFDGene08697,HFDGene08698,HFDGene08699,HFDGene10191,HFDGene10194,HFDGene10192,HFDGene10193,HFDGene10198,HFDGene10199,HFDGene10196,HFDGene10197,HFDGene08721,HFDGene08704,HFDGene08706,HFDGene08707,HFDGene08708,HFDGene08709,HFDGene08700,HFDGene08701,HFDGene08702,HFDGene08703,HFDGene08715,HFDGene08719,HFDGene08710,HFDGene08711,HFDGene08712,HFDGene08713,HFDGene10208,HFDGene10202,HFDGene10…	1.10921e-14
Biological process	cellular process involved in reproduction in multicellular organism	GO:0022412	3	1.11022e-16	5.88378	39	43	823	5339	HFDGene08696,HFDGene08697,HFDGene08698,HFDGene08699,HFDGene10191,HFDGene10194,HFDGene10192,HFDGene10193,HFDGene10198,HFDGene10199,HFDGene10196,HFDGene10197,HFDGene08721,HFDGene08704,HFDGene08706,HFDGene08707,HFDGene08708,HFDGene08709,HFDGene08700,HFDGene08701,HFDGene08702,HFDGene08703,HFDGene08715,HFDGene08719,HFDGene08710,HFDGene08711,HFDGene08712,HFDGene08713,HFDGene10208,HFDGene10202,HFDGene10…	1.10921e-14
Biological process	anatomical structure morphogenesis	GO:0009653	3	5.55112e-16	3.77616	39	67	823	5339	HFDGene08696,HFDGene08697,HFDGene08698,HFDGene08699,HFDGene10191,HFDGene10194,HFDGene10192,HFDGene10193,HFDGene10198,HFDGene10199,HFDGene10196,HFDGene10197,HFDGene08721,HFDGene08704,HFDGene08706,HFDGene08707,HFDGene08708,HFDGene08709,HFDGene08700,HFDGene08701,HFDGene08702,HFDGene08703,HFDGene08715,HFDGene08718,HFDGene08719,HFDGene08710,HFDGene08711,HFDGene08712,HFDGene08713,HFDGene10208,HFDGene10…	2.34641e-14
Biological process	cellular developmental process	GO:0048869	3	9.10383e-15	3.45425	41	77	823	5339	HFDGene08696,HFDGene08697,HFDGene08698,HFDGene08699,HFDGene10191,HFDGene10194,HFDGene10192,HFDGene10193,HFDGene10198,HFDGene10199,HFDGene10196,HFDGene10197,HFDGene08754,HFDGene08721,HFDGene08704,HFDGene08706,HFDGene08707,HFDGene08708,HFDGene08709,HFDGene08700,HFDGene08701,HFDGene08702,HFDGene08703,HFDGene08715,HFDGene08718,HFDGene08719,HFDGene08710,HFDGene08711,HFDGene08712,HFDGene08713,HFDGene10…	3.57325e-13
Molecular function	transmembrane transporter activity	GO:0022857	3	1.98841e-13	1.76532	147	533	1255	8033	HFDGene08249,HFDGene01625,HFDGene01626,HFDGene10565,HFDGene00738,HFDGene08686,HFDGene11868,HFDGene10534,HFDGene07369,HFDGene06008,HFDGene06485,HFDGene14524,HFDGene12333,HFDGene12320,HFDGene12325,HFDGene12324,HFDGene12327,HFDGene12309,HFDGene12311,HFDGene12318,HFDGene02993,HFDGene12300,HFDGene12304,HFDGene01638,HFDGene01637,HFDGene00316,HFDGene01644,HFDGene03818,HFDGene02146,HFDGene15455,HFDGene15…	8.7643e-12
Cellular component	cell periphery	GO:0071944	3	2.39453e-12	2.44644	59	165	436	2983	HFDGene00749,HFDGene11868,HFDGene08696,HFDGene08697,HFDGene08698,HFDGene08699,HFDGene05656,HFDGene05657,HFDGene01272,HFDGene17614,HFDGene10191,HFDGene10194,HFDGene10192,HFDGene10193,HFDGene10198,HFDGene10199,HFDGene10196,HFDGene10197,HFDGene08721,HFDGene08704,HFDGene08706,HFDGene08707,HFDGene08708,HFDGene08709,HFDGene08700,HFDGene08701,HFDGene08702,HFDGene08703,HFDGene08715,HFDGene08719,HFDGene08…	1.31699e-10
Biological process	anatomical structure development	GO:0048856	3	7.03715e-11	2.61766	46	114	823	5339	HFDGene08696,HFDGene08697,HFDGene08698,HFDGene08699,HFDGene10191,HFDGene10194,HFDGene10192,HFDGene10193,HFDGene10198,HFDGene10199,HFDGene10196,HFDGene10197,HFDGene08754,HFDGene08721,HFDGene08704,HFDGene08706,HFDGene08707,HFDGene08708,HFDGene08709,HFDGene08700,HFDGene08701,HFDGene08702,HFDGene08703,HFDGene08715,HFDGene08718,HFDGene08719,HFDGene08710,HFDGene08711,HFDGene08712,HFDGene08713,HFDGene10…	2.34358e-09
Cellular component	intrinsic component of membrane	GO:0031224	3	5.0629e-09	1.4608	158	740	436	2983	HFDGene06042,HFDGene00749,HFDGene11868,HFDGene07369,HFDGene06008,HFDGene09516,HFDGene14522,HFDGene14524,HFDGene12333,HFDGene12320,HFDGene12325,HFDGene12324,HFDGene12327,HFDGene12309,HFDGene12311,HFDGene12318,HFDGene02993,HFDGene12300,HFDGene12304,HFDGene00316,HFDGene03825,HFDGene03818,HFDGene05655,HFDGene02146,HFDGene07834,HFDGene01272,HFDGene15446,HFDGene17614,HFDGene02588,HFDGene14573,HFDGene02…	1.8564e-07
Molecular function	pigment binding	GO:0031409	3	5.32618e-09	4.8006	15	20	1255	8033	HFDGene04744,HFDGene11539,HFDGene12090,HFDGene12093,HFDGene12092,HFDGene12087,HFDGene12086,HFDGene12085,HFDGene12089,HFDGene12088,HFDGene14872,HFDGene14873,HFDGene14875,HFDGene14876,HFDGene14877,	1.45329e-07
Molecular function	hydrolase activity	GO:0016787	3	8.34417e-08	1.28424	315	1570	1255	8033	HFDGene10576,HFDGene12758,HFDGene12757,HFDGene09105,HFDGene06059,HFDGene07387,HFDGene02930,HFDGene07381,HFDGene07383,HFDGene10540,HFDGene02929,HFDGene02928,HFDGene05171,HFDGene10535,HFDGene05189,HFDGene08214,HFDGene06481,HFDGene06480,HFDGene04727,HFDGene13685,HFDGene04732,HFDGene14529,HFDGene09150,HFDGene09151,HFDGene14519,HFDGene01207,HFDGene00356,HFDGene09164,HFDGene11466,HFDGene14950,HFDGene14…	2.17328e-06
Molecular function	peptidoglycan muralytic activity	GO:0061783	3	1.42854e-05	3.4671	13	24	1255	8033	HFDGene06481,HFDGene06480,HFDGene00877,HFDGene00872,HFDGene12926,HFDGene12925,HFDGene12924,HFDGene06479,HFDGene10914,HFDGene10912,HFDGene10909,HFDGene10911,HFDGene10910,	0.000327422
Biological process	establishment of localization	GO:0051234	3	7.10221e-05	1.27768	181	919	823	5339	HFDGene08249,HFDGene01625,HFDGene10565,HFDGene00738,HFDGene06042,HFDGene00749,HFDGene08686,HFDGene11868,HFDGene10534,HFDGene11849,HFDGene11847,HFDGene07369,HFDGene06008,HFDGene06485,HFDGene14524,HFDGene12333,HFDGene12320,HFDGene12325,HFDGene12324,HFDGene12327,HFDGene12309,HFDGene12311,HFDGene12318,HFDGene02993,HFDGene12300,HFDGene12304,HFDGene01638,HFDGene06086,HFDGene00316,HFDGene01644,HFDGene03…	0.00173452
Biological process	response to external stimulus	GO:0009605	3	0.000188555	2.27623	20	57	823	5339	HFDGene09568,HFDGene01662,HFDGene14573,HFDGene00877,HFDGene01791,HFDGene01790,HFDGene12415,HFDGene02205,HFDGene17366,HFDGene09717,HFDGene05365,HFDGene00978,HFDGene16060,HFDGene17380,HFDGene13420,HFDGene13421,HFDGene10914,HFDGene10912,HFDGene10911,HFDGene10910,	0.00450483
Biological process	detection of stimulus	GO:0051606	3	0.000783978	3.78422	7	12	823	5339	HFDGene14573,HFDGene01791,HFDGene01790,HFDGene12415,HFDGene02205,HFDGene05365,HFDGene00978,	0.0165691
Biological process	response to abiotic stimulus	GO:0009628	3	0.000783978	3.78422	7	12	823	5339	HFDGene14573,HFDGene01791,HFDGene01790,HFDGene12415,HFDGene02205,HFDGene05365,HFDGene00978,	0.0165691
Molecular function	signaling receptor activity	GO:0038023	3	0.00142748	1.46524	57	249	1255	8033	HFDGene01606,HFDGene01625,HFDGene01626,HFDGene09516,HFDGene14524,HFDGene01638,HFDGene01637,HFDGene05655,HFDGene02146,HFDGene07834,HFDGene01272,HFDGene05648,HFDGene02588,HFDGene14573,HFDGene02592,HFDGene15870,HFDGene07438,HFDGene07001,HFDGene12807,HFDGene12809,HFDGene13329,HFDGene03523,HFDGene01791,HFDGene01790,HFDGene00472,HFDGene12415,HFDGene12400,HFDGene13375,HFDGene02205,HFDGene17707,HFDGene07…	0.0181765
Biological process	immune response	GO:0006955	3	0.00204452	3.05282	8	17	823	5339	HFDGene00877,HFDGene09717,HFDGene13420,HFDGene13421,HFDGene10914,HFDGene10912,HFDGene10911,HFDGene10910,	0.0374488
Biological process	response to biotic stimulus	GO:0009607	3	0.00356367	2.37866	11	30	823	5339	HFDGene01662,HFDGene00877,HFDGene17366,HFDGene09717,HFDGene17380,HFDGene13420,HFDGene13421,HFDGene10914,HFDGene10912,HFDGene10911,HFDGene10910,	0.0543954
Cellular component	extracellular space	GO:0005615	3	0.00467974	2.21894	12	37	436	2983	HFDGene09573,HFDGene10576,HFDGene09568,HFDGene03439,HFDGene03437,HFDGene03436,HFDGene03995,HFDGene03997,HFDGene01473,HFDGene02439,HFDGene15701,HFDGene13155,	0.114394
Molecular function	lipid transporter activity	GO:0005319	3	0.00697089	2.80035	7	16	1255	8033	HFDGene17670,HFDGene17669,HFDGene03514,HFDGene04881,HFDGene12091,HFDGene03696,HFDGene16169,	0.06052
Molecular function	lyase activity	GO:0016829	3	0.014751	1.61948	21	83	1255	8033	HFDGene03825,HFDGene03890,HFDGene00813,HFDGene11531,HFDGene00864,HFDGene10660,HFDGene10658,HFDGene12462,HFDGene12075,HFDGene12074,HFDGene02253,HFDGene11156,HFDGene06671,HFDGene11668,HFDGene04063,HFDGene04062,HFDGene07205,HFDGene07649,HFDGene14015,HFDGene16274,HFDGene08645,	0.108363
Molecular function	odorant binding	GO:0005549	3	0.0169628	1.64345	19	74	1255	8033	HFDGene14938,HFDGene14943,HFDGene11094,HFDGene05648,HFDGene15870,HFDGene07001,HFDGene09290,HFDGene02747,HFDGene02743,HFDGene02744,HFDGene01489,HFDGene08193,HFDGene04654,HFDGene04655,HFDGene04652,HFDGene04650,HFDGene04658,HFDGene04659,HFDGene04657,	0.121496
Molecular function	catalytic activity, acting on a protein	GO:0140096	3	0.0253367	1.14159	173	970	1255	8033	HFDGene01606,HFDGene12758,HFDGene12757,HFDGene09105,HFDGene02930,HFDGene10540,HFDGene02929,HFDGene02928,HFDGene05171,HFDGene10535,HFDGene00712,HFDGene04727,HFDGene00374,HFDGene04737,HFDGene14529,HFDGene02527,HFDGene14959,HFDGene03824,HFDGene03825,HFDGene13281,HFDGene13288,HFDGene02126,HFDGene16776,HFDGene03467,HFDGene14586,HFDGene02580,HFDGene11067,HFDGene06921,HFDGene03898,HFDGene06922,HFDGene12…	0.138266
Cellular component	supramolecular polymer	GO:0099081	3	0.031939	2.17692	7	22	436	2983	HFDGene05193,HFDGene02549,HFDGene02550,HFDGene14558,HFDGene09774,HFDGene17003,HFDGene06861,	0.270253
Cellular component	chorion	GO:0042600	4	0	6.38563	42	45	436	2983	HFDGene08696,HFDGene08697,HFDGene08698,HFDGene08699,HFDGene05656,HFDGene05657,HFDGene10191,HFDGene10194,HFDGene10192,HFDGene10193,HFDGene10198,HFDGene10199,HFDGene10196,HFDGene10197,HFDGene08721,HFDGene08704,HFDGene08706,HFDGene08707,HFDGene08708,HFDGene08709,HFDGene08700,HFDGene08701,HFDGene08702,HFDGene08703,HFDGene08715,HFDGene08719,HFDGene08710,HFDGene08711,HFDGene08712,HFDGene08713,HFDGene10…	0
Biological process	cell development	GO:0048468	4	0	3.95316	39	64	823	5339	HFDGene08696,HFDGene08697,HFDGene08698,HFDGene08699,HFDGene10191,HFDGene10194,HFDGene10192,HFDGene10193,HFDGene10198,HFDGene10199,HFDGene10196,HFDGene10197,HFDGene08721,HFDGene08704,HFDGene08706,HFDGene08707,HFDGene08708,HFDGene08709,HFDGene08700,HFDGene08701,HFDGene08702,HFDGene08703,HFDGene08715,HFDGene08719,HFDGene08710,HFDGene08711,HFDGene08712,HFDGene08713,HFDGene10208,HFDGene10202,HFDGene10…	0
Biological process	sexual reproduction	GO:0019953	4	0	5.65908	41	47	823	5339	HFDGene05179,HFDGene08696,HFDGene08697,HFDGene08698,HFDGene08699,HFDGene10191,HFDGene10194,HFDGene10192,HFDGene10193,HFDGene10198,HFDGene10199,HFDGene10196,HFDGene10197,HFDGene08721,HFDGene08704,HFDGene08706,HFDGene08707,HFDGene08708,HFDGene08709,HFDGene08700,HFDGene08701,HFDGene08702,HFDGene08703,HFDGene08715,HFDGene08719,HFDGene08710,HFDGene08711,HFDGene08712,HFDGene08713,HFDGene10208,HFDGene10…	0
Biological process	tissue development	GO:0009888	4	1.11022e-16	5.58205	37	43	823	5339	HFDGene08696,HFDGene08697,HFDGene08698,HFDGene08699,HFDGene10191,HFDGene10194,HFDGene10192,HFDGene10193,HFDGene10198,HFDGene10199,HFDGene10196,HFDGene10197,HFDGene08721,HFDGene08704,HFDGene08706,HFDGene08707,HFDGene08708,HFDGene08709,HFDGene08700,HFDGene08701,HFDGene08702,HFDGene08703,HFDGene08715,HFDGene08719,HFDGene08710,HFDGene08711,HFDGene08712,HFDGene08713,HFDGene10208,HFDGene10202,HFDGene10…	1.10921e-14
Biological process	eggshell formation	GO:0030703	4	1.11022e-16	6.31652	37	38	823	5339	HFDGene08696,HFDGene08697,HFDGene08698,HFDGene08699,HFDGene10191,HFDGene10194,HFDGene10192,HFDGene10193,HFDGene10198,HFDGene10199,HFDGene10196,HFDGene10197,HFDGene08721,HFDGene08704,HFDGene08706,HFDGene08707,HFDGene08708,HFDGene08709,HFDGene08700,HFDGene08701,HFDGene08702,HFDGene08703,HFDGene08715,HFDGene08719,HFDGene08710,HFDGene08711,HFDGene08712,HFDGene08713,HFDGene10208,HFDGene10202,HFDGene10…	1.10921e-14
Biological process	gamete generation	GO:0007276	4	2.22045e-16	5.62228	39	45	823	5339	HFDGene08696,HFDGene08697,HFDGene08698,HFDGene08699,HFDGene10191,HFDGene10194,HFDGene10192,HFDGene10193,HFDGene10198,HFDGene10199,HFDGene10196,HFDGene10197,HFDGene08721,HFDGene08704,HFDGene08706,HFDGene08707,HFDGene08708,HFDGene08709,HFDGene08700,HFDGene08701,HFDGene08702,HFDGene08703,HFDGene08715,HFDGene08719,HFDGene08710,HFDGene08711,HFDGene08712,HFDGene08713,HFDGene10208,HFDGene10202,HFDGene10…	1.01678e-14
Molecular function	serine hydrolase activity	GO:0017171	4	3.33067e-16	2.68249	101	241	1255	8033	HFDGene09105,HFDGene02930,HFDGene10540,HFDGene02929,HFDGene02928,HFDGene05171,HFDGene04727,HFDGene14529,HFDGene03824,HFDGene02126,HFDGene02580,HFDGene03898,HFDGene12370,HFDGene02578,HFDGene02577,HFDGene12366,HFDGene10605,HFDGene16378,HFDGene16377,HFDGene07886,HFDGene04371,HFDGene09658,HFDGene02644,HFDGene02645,HFDGene02658,HFDGene02657,HFDGene02603,HFDGene14244,HFDGene14241,HFDGene14242,HFDGene14…	3.18079e-14
Molecular function	tetrapyrrole binding	GO:0046906	4	5.55112e-16	2.89766	67	148	1255	8033	HFDGene11420,HFDGene12753,HFDGene12752,HFDGene09176,HFDGene16717,HFDGene16714,HFDGene02559,HFDGene02558,HFDGene09182,HFDGene09169,HFDGene09168,HFDGene09130,HFDGene12788,HFDGene15810,HFDGene12789,HFDGene05656,HFDGene05657,HFDGene16757,HFDGene02564,HFDGene17675,HFDGene09213,HFDGene09210,HFDGene09211,HFDGene09212,HFDGene11545,HFDGene07492,HFDGene09209,HFDGene11968,HFDGene12457,HFDGene12459,HFDGene09…	3.97599e-14
Biological process	cell differentiation	GO:0030154	4	2.77556e-15	3.60402	40	72	823	5339	HFDGene08696,HFDGene08697,HFDGene08698,HFDGene08699,HFDGene10191,HFDGene10194,HFDGene10192,HFDGene10193,HFDGene10198,HFDGene10199,HFDGene10196,HFDGene10197,HFDGene08754,HFDGene08721,HFDGene08704,HFDGene08706,HFDGene08707,HFDGene08708,HFDGene08709,HFDGene08700,HFDGene08701,HFDGene08702,HFDGene08703,HFDGene08715,HFDGene08719,HFDGene08710,HFDGene08711,HFDGene08712,HFDGene08713,HFDGene10208,HFDGene10…	1.12975e-13
Molecular function	chitin binding	GO:0008061	4	2.88658e-15	3.60608	40	71	1255	8033	HFDGene08254,HFDGene07335,HFDGene07336,HFDGene07337,HFDGene04732,HFDGene03843,HFDGene14147,HFDGene11542,HFDGene11537,HFDGene15089,HFDGene00458,HFDGene00459,HFDGene13364,HFDGene05719,HFDGene08460,HFDGene08461,HFDGene08457,HFDGene07608,HFDGene08523,HFDGene07202,HFDGene08518,HFDGene08519,HFDGene07610,HFDGene01951,HFDGene01950,HFDGene01948,HFDGene01949,HFDGene01946,HFDGene08543,HFDGene09035,HFDGene05…	1.83779e-13
Molecular function	peptidase activity	GO:0008233	4	6.06182e-14	1.81058	142	502	1255	8033	HFDGene12758,HFDGene12757,HFDGene09105,HFDGene02930,HFDGene10540,HFDGene02929,HFDGene02928,HFDGene05171,HFDGene10535,HFDGene04727,HFDGene14529,HFDGene14959,HFDGene03824,HFDGene02126,HFDGene03467,HFDGene14586,HFDGene02580,HFDGene11067,HFDGene06921,HFDGene03898,HFDGene06922,HFDGene12370,HFDGene14551,HFDGene02578,HFDGene02577,HFDGene12366,HFDGene10605,HFDGene15061,HFDGene17236,HFDGene16378,HFDGene16…	3.15766e-12
Molecular function	monooxygenase activity	GO:0004497	4	1.13833e-11	2.71025	47	111	1255	8033	HFDGene12753,HFDGene12752,HFDGene09176,HFDGene16717,HFDGene16714,HFDGene02559,HFDGene02558,HFDGene09182,HFDGene09169,HFDGene09168,HFDGene09130,HFDGene12788,HFDGene12789,HFDGene16757,HFDGene02564,HFDGene17675,HFDGene07492,HFDGene12457,HFDGene12459,HFDGene03931,HFDGene04427,HFDGene04428,HFDGene17741,HFDGene17739,HFDGene17736,HFDGene15994,HFDGene05314,HFDGene16951,HFDGene14738,HFDGene16985,HFDGene08…	3.83685e-10
Molecular function	oxidoreductase activity, acting on paired donors, with incorporation or reduction of molecular oxygen	GO:0016705	4	1.87358e-11	2.51291	53	135	1255	8033	HFDGene12751,HFDGene12753,HFDGene12752,HFDGene09176,HFDGene16717,HFDGene16714,HFDGene02559,HFDGene02558,HFDGene09182,HFDGene09169,HFDGene09168,HFDGene09130,HFDGene12788,HFDGene12789,HFDGene16757,HFDGene02564,HFDGene17675,HFDGene07492,HFDGene12457,HFDGene12459,HFDGene03931,HFDGene05771,HFDGene04427,HFDGene04428,HFDGene17741,HFDGene05769,HFDGene17739,HFDGene17736,HFDGene15994,HFDGene05314,HFDGene17…	5.96423e-10
Biological process	carbohydrate metabolic process	GO:0005975	4	2.34009e-11	2.26876	64	183	823	5339	HFDGene00759,HFDGene08254,HFDGene00757,HFDGene00758,HFDGene04732,HFDGene09150,HFDGene09151,HFDGene14519,HFDGene10143,HFDGene14147,HFDGene11529,HFDGene11537,HFDGene10660,HFDGene10658,HFDGene11502,HFDGene15089,HFDGene00458,HFDGene00459,HFDGene10241,HFDGene11561,HFDGene12884,HFDGene00094,HFDGene00093,HFDGene04425,HFDGene02253,HFDGene07530,HFDGene07974,HFDGene11606,HFDGene11605,HFDGene11604,HFDGene11…	8.57255e-10
Biological process	multicellular organism development	GO:0007275	4	3.69503e-11	2.7619	43	101	823	5339	HFDGene08696,HFDGene08697,HFDGene08698,HFDGene08699,HFDGene10191,HFDGene10194,HFDGene10192,HFDGene10193,HFDGene10198,HFDGene10199,HFDGene10196,HFDGene10197,HFDGene08754,HFDGene08721,HFDGene08704,HFDGene08706,HFDGene08707,HFDGene08708,HFDGene08709,HFDGene08700,HFDGene08701,HFDGene08702,HFDGene08703,HFDGene08715,HFDGene08719,HFDGene08710,HFDGene08711,HFDGene08712,HFDGene08713,HFDGene10208,HFDGene10…	1.30995e-09
Molecular function	hydrolase activity, acting on glycosyl bonds	GO:0016798	4	1.2642e-10	2.61851	45	110	1255	8033	HFDGene05189,HFDGene06481,HFDGene06480,HFDGene09150,HFDGene09151,HFDGene14519,HFDGene11049,HFDGene14147,HFDGene11537,HFDGene11502,HFDGene10241,HFDGene11561,HFDGene04425,HFDGene07974,HFDGene11606,HFDGene11605,HFDGene12926,HFDGene12925,HFDGene11604,HFDGene11603,HFDGene12924,HFDGene00139,HFDGene00137,HFDGene00138,HFDGene16947,HFDGene13471,HFDGene13472,HFDGene13473,HFDGene00140,HFDGene00141,HFDGene04…	3.62194e-09
Cellular component	integral component of membrane	GO:0016021	4	4.05977e-09	1.46476	158	738	436	2983	HFDGene06042,HFDGene00749,HFDGene11868,HFDGene07369,HFDGene06008,HFDGene09516,HFDGene14522,HFDGene14524,HFDGene12333,HFDGene12320,HFDGene12325,HFDGene12324,HFDGene12327,HFDGene12309,HFDGene12311,HFDGene12318,HFDGene02993,HFDGene12300,HFDGene12304,HFDGene00316,HFDGene03825,HFDGene03818,HFDGene05655,HFDGene02146,HFDGene07834,HFDGene01272,HFDGene15446,HFDGene17614,HFDGene02588,HFDGene14573,HFDGene02…	1.7863e-07
Biological process	response to oxidative stress	GO:0006979	4	1.6393e-06	3.60402	15	27	823	5339	HFDGene05656,HFDGene05657,HFDGene09213,HFDGene09210,HFDGene09211,HFDGene09212,HFDGene11545,HFDGene09209,HFDGene09257,HFDGene09258,HFDGene16915,HFDGene05933,HFDGene09004,HFDGene17096,HFDGene06856,	5.1474e-05
Biological process	detection of external stimulus	GO:0009581	4	2.02385e-06	6.48724	7	7	823	5339	HFDGene14573,HFDGene01791,HFDGene01790,HFDGene12415,HFDGene02205,HFDGene05365,HFDGene00978,	6.17835e-05
Biological process	detection of abiotic stimulus	GO:0009582	4	2.02385e-06	6.48724	7	7	823	5339	HFDGene14573,HFDGene01791,HFDGene01790,HFDGene12415,HFDGene02205,HFDGene05365,HFDGene00978,	6.17835e-05
Molecular function	coenzyme binding	GO:0050662	4	7.16509e-06	1.82369	51	179	1255	8033	HFDGene02951,HFDGene14924,HFDGene09164,HFDGene13636,HFDGene09111,HFDGene05638,HFDGene05636,HFDGene14597,HFDGene04764,HFDGene04765,HFDGene04763,HFDGene04767,HFDGene03890,HFDGene06585,HFDGene17217,HFDGene06548,HFDGene12462,HFDGene14628,HFDGene15939,HFDGene02273,HFDGene02253,HFDGene15994,HFDGene00934,HFDGene15179,HFDGene16015,HFDGene16017,HFDGene16019,HFDGene02286,HFDGene09318,HFDGene12952,HFDGene16…	0.000171066
Biological process	response to radiation	GO:0009314	4	1.40227e-05	5.67634	7	8	823	5339	HFDGene14573,HFDGene01791,HFDGene01790,HFDGene12415,HFDGene02205,HFDGene05365,HFDGene00978,	0.000366927
Molecular function	oxidoreductase activity, acting on peroxide as acceptor	GO:0016684	4	1.86443e-05	3.09716	15	31	1255	8033	HFDGene05656,HFDGene05657,HFDGene09213,HFDGene09210,HFDGene09211,HFDGene09212,HFDGene11545,HFDGene09209,HFDGene09257,HFDGene09258,HFDGene16915,HFDGene05933,HFDGene09004,HFDGene17096,HFDGene06856,	0.000410893
Biological process	transport	GO:0006810	4	5.82692e-05	1.28187	181	916	823	5339	HFDGene08249,HFDGene01625,HFDGene10565,HFDGene00738,HFDGene06042,HFDGene00749,HFDGene08686,HFDGene11868,HFDGene10534,HFDGene11849,HFDGene11847,HFDGene07369,HFDGene06008,HFDGene06485,HFDGene14524,HFDGene12333,HFDGene12320,HFDGene12325,HFDGene12324,HFDGene12327,HFDGene12309,HFDGene12311,HFDGene12318,HFDGene02993,HFDGene12300,HFDGene12304,HFDGene01638,HFDGene06086,HFDGene00316,HFDGene01644,HFDGene03…	0.0014554
Biological process	defense response	GO:0006952	4	0.000503721	2.63544	13	32	823	5339	HFDGene12731,HFDGene01662,HFDGene00877,HFDGene17366,HFDGene09717,HFDGene17380,HFDGene13420,HFDGene13421,HFDGene15761,HFDGene10914,HFDGene10912,HFDGene10911,HFDGene10910,	0.0110718
Molecular function	transmembrane signaling receptor activity	GO:0004888	4	0.000769701	1.50142	57	243	1255	8033	HFDGene01606,HFDGene01625,HFDGene01626,HFDGene09516,HFDGene14524,HFDGene01638,HFDGene01637,HFDGene05655,HFDGene02146,HFDGene07834,HFDGene01272,HFDGene05648,HFDGene02588,HFDGene14573,HFDGene02592,HFDGene15870,HFDGene07438,HFDGene07001,HFDGene12807,HFDGene12809,HFDGene13329,HFDGene03523,HFDGene01791,HFDGene01790,HFDGene00472,HFDGene12415,HFDGene12400,HFDGene13375,HFDGene02205,HFDGene17707,HFDGene07…	0.0116063
Molecular function	glycosaminoglycan binding	GO:0005539	4	0.00078816	4.2672	6	9	1255	8033	HFDGene09568,HFDGene00877,HFDGene10914,HFDGene10912,HFDGene10911,HFDGene10910,	0.0115799
Biological process	small molecule catabolic process	GO:0044282	4	0.00175935	2.27053	14	40	823	5339	HFDGene10576,HFDGene09164,HFDGene02148,HFDGene04764,HFDGene04765,HFDGene04763,HFDGene04767,HFDGene14628,HFDGene03936,HFDGene10822,HFDGene10821,HFDGene06374,HFDGene14015,HFDGene16215,	0.0327715
Molecular function	hydrolase activity, acting on carbon-nitrogen (but not peptide) bonds	GO:0016810	4	0.00193488	1.93964	20	66	1255	8033	HFDGene10576,HFDGene04732,HFDGene02127,HFDGene00877,HFDGene00872,HFDGene00856,HFDGene09288,HFDGene00459,HFDGene12885,HFDGene07192,HFDGene07199,HFDGene07200,HFDGene08991,HFDGene08992,HFDGene15736,HFDGene10914,HFDGene10912,HFDGene10909,HFDGene10911,HFDGene10910,	0.0230976
Molecular function	oxidoreductase activity, acting on the CH-CH group of donors	GO:0016627	4	0.00211505	2.3114	13	36	1255	8033	HFDGene04764,HFDGene04765,HFDGene04763,HFDGene04767,HFDGene14628,HFDGene06634,HFDGene06632,HFDGene06639,HFDGene06636,HFDGene15179,HFDGene06653,HFDGene09318,HFDGene01456,	0.0247332
Molecular function	oxidoreductase activity, acting on single donors with incorporation of molecular oxygen	GO:0016701	4	0.00278455	3.2004	7	14	1255	8033	HFDGene13848,HFDGene10312,HFDGene10311,HFDGene08020,HFDGene10822,HFDGene10821,HFDGene06374,	0.0319109
Molecular function	hydrolase activity, acting on ether bonds	GO:0016801	4	0.00341849	4.0005	5	8	1255	8033	HFDGene15691,HFDGene15693,HFDGene15694,HFDGene01588,HFDGene13158,	0.0356145
Molecular function	carbon-nitrogen lyase activity	GO:0016840	4	0.00341849	4.0005	5	8	1255	8033	HFDGene11156,HFDGene06671,HFDGene04063,HFDGene04062,HFDGene07205,	0.0356145
Biological process	response to external biotic stimulus	GO:0043207	4	0.00356367	2.37866	11	30	823	5339	HFDGene01662,HFDGene00877,HFDGene17366,HFDGene09717,HFDGene17380,HFDGene13420,HFDGene13421,HFDGene10914,HFDGene10912,HFDGene10911,HFDGene10910,	0.0543954
Molecular function	passive transmembrane transporter activity	GO:0022803	4	0.00383178	1.52214	39	164	1255	8033	HFDGene01625,HFDGene01626,HFDGene10565,HFDGene00738,HFDGene11868,HFDGene14524,HFDGene01638,HFDGene01637,HFDGene02146,HFDGene14568,HFDGene11910,HFDGene15495,HFDGene06141,HFDGene12807,HFDGene12809,HFDGene12802,HFDGene14657,HFDGene17707,HFDGene16491,HFDGene00974,HFDGene08424,HFDGene04941,HFDGene04942,HFDGene03608,HFDGene01053,HFDGene01033,HFDGene00194,HFDGene03688,HFDGene04506,HFDGene01482,HFDGene10…	0.0372137
Biological process	lipid metabolic process	GO:0006629	4	0.00463178	1.41995	51	233	823	5339	HFDGene07387,HFDGene07381,HFDGene05189,HFDGene08214,HFDGene00785,HFDGene04764,HFDGene04765,HFDGene04763,HFDGene04767,HFDGene11049,HFDGene04759,HFDGene06548,HFDGene03011,HFDGene14628,HFDGene09246,HFDGene12885,HFDGene05771,HFDGene13384,HFDGene02255,HFDGene02254,HFDGene05769,HFDGene06220,HFDGene05319,HFDGene17788,HFDGene10383,HFDGene13404,HFDGene01001,HFDGene16150,HFDGene03271,HFDGene03272,HFDGene05…	0.0644346
Molecular function	oxidoreductase activity, acting on CH-OH group of donors	GO:0016614	4	0.00622621	1.71729	22	82	1255	8033	HFDGene13636,HFDGene14597,HFDGene05614,HFDGene17217,HFDGene06548,HFDGene02273,HFDGene16015,HFDGene16017,HFDGene16019,HFDGene10311,HFDGene16063,HFDGene16045,HFDGene06717,HFDGene09402,HFDGene11796,HFDGene11795,HFDGene15338,HFDGene15339,HFDGene15321,HFDGene10973,HFDGene10975,HFDGene10974,	0.0575422
Biological process	drug metabolic process	GO:0017144	4	0.0123958	1.75053	17	63	823	5339	HFDGene10576,HFDGene02148,HFDGene05614,HFDGene06585,HFDGene14147,HFDGene00856,HFDGene03936,HFDGene14248,HFDGene13384,HFDGene05797,HFDGene06653,HFDGene07199,HFDGene16915,HFDGene07200,HFDGene06374,HFDGene14015,HFDGene16215,	0.16027
Biological process	organic acid metabolic process	GO:0006082	4	0.0226227	1.37947	37	174	823	5339	HFDGene09164,HFDGene13636,HFDGene09111,HFDGene02127,HFDGene04764,HFDGene04765,HFDGene04763,HFDGene04767,HFDGene03890,HFDGene06585,HFDGene06548,HFDGene05691,HFDGene05673,HFDGene10660,HFDGene10658,HFDGene12472,HFDGene12462,HFDGene01795,HFDGene09288,HFDGene14628,HFDGene03936,HFDGene02273,HFDGene13384,HFDGene02697,HFDGene07192,HFDGene08020,HFDGene15660,HFDGene07205,HFDGene17063,HFDGene09402,HFDGene06…	0.267337
Molecular function	neurotransmitter receptor activity	GO:0030594	4	0.0250655	1.93964	10	33	1255	8033	HFDGene01625,HFDGene01626,HFDGene01638,HFDGene01637,HFDGene03523,HFDGene17707,HFDGene00974,HFDGene04506,HFDGene01482,HFDGene16165,	0.138101
Molecular function	peptidase regulator activity	GO:0061134	4	0.0258566	1.65182	16	62	1255	8033	HFDGene09573,HFDGene09568,HFDGene03439,HFDGene03437,HFDGene03436,HFDGene03995,HFDGene03997,HFDGene04801,HFDGene07256,HFDGene02439,HFDGene15701,HFDGene01521,HFDGene01524,HFDGene13155,HFDGene14447,HFDGene11804,	0.139772
Cellular component	supramolecular fiber	GO:0099512	4	0.031939	2.17692	7	22	436	2983	HFDGene05193,HFDGene02549,HFDGene02550,HFDGene14558,HFDGene09774,HFDGene17003,HFDGene06861,	0.270253
Biological process	organic hydroxy compound metabolic process	GO:1901615	4	0.0393348	1.88339	9	31	823	5339	HFDGene05179,HFDGene13636,HFDGene05614,HFDGene06549,HFDGene12884,HFDGene02273,HFDGene10822,HFDGene10821,HFDGene05123,	0.379201
Molecular function	transferase activity, transferring nitrogenous groups	GO:0016769	4	0.0398661	2.46184	5	13	1255	8033	HFDGene05638,HFDGene05636,HFDGene00934,HFDGene04294,HFDGene05573,	0.209572
Molecular function	enzyme inhibitor activity	GO:0004857	4	0.0488401	1.5113	17	72	1255	8033	HFDGene09573,HFDGene09568,HFDGene03439,HFDGene03437,HFDGene03436,HFDGene06129,HFDGene03995,HFDGene03997,HFDGene04801,HFDGene07256,HFDGene02439,HFDGene15701,HFDGene01521,HFDGene01524,HFDGene13155,HFDGene14447,HFDGene11804,	0.252121
Molecular function	heme binding	GO:0020037	5	0	2.91737	67	147	1255	8033	HFDGene11420,HFDGene12753,HFDGene12752,HFDGene09176,HFDGene16717,HFDGene16714,HFDGene02559,HFDGene02558,HFDGene09182,HFDGene09169,HFDGene09168,HFDGene09130,HFDGene12788,HFDGene15810,HFDGene12789,HFDGene05656,HFDGene05657,HFDGene16757,HFDGene02564,HFDGene17675,HFDGene09213,HFDGene09210,HFDGene09211,HFDGene09212,HFDGene11545,HFDGene07492,HFDGene09209,HFDGene11968,HFDGene12457,HFDGene12459,HFDGene09…	0
Biological process	transmembrane transport	GO:0055085	5	0	1.87983	153	528	823	5339	HFDGene08249,HFDGene10565,HFDGene00738,HFDGene06042,HFDGene08686,HFDGene11868,HFDGene10534,HFDGene11849,HFDGene11847,HFDGene07369,HFDGene06008,HFDGene06485,HFDGene14524,HFDGene12333,HFDGene12320,HFDGene12325,HFDGene12324,HFDGene12327,HFDGene12309,HFDGene12311,HFDGene12318,HFDGene02993,HFDGene12300,HFDGene12304,HFDGene06086,HFDGene00316,HFDGene01644,HFDGene03818,HFDGene02146,HFDGene15455,HFDGene15…	0
Biological process	epithelial cell development	GO:0002064	5	1.11022e-16	6.31652	37	38	823	5339	HFDGene08696,HFDGene08697,HFDGene08698,HFDGene08699,HFDGene10191,HFDGene10194,HFDGene10192,HFDGene10193,HFDGene10198,HFDGene10199,HFDGene10196,HFDGene10197,HFDGene08721,HFDGene08704,HFDGene08706,HFDGene08707,HFDGene08708,HFDGene08709,HFDGene08700,HFDGene08701,HFDGene08702,HFDGene08703,HFDGene08715,HFDGene08719,HFDGene08710,HFDGene08711,HFDGene08712,HFDGene08713,HFDGene10208,HFDGene10202,HFDGene10…	1.10921e-14
Biological process	epithelial cell differentiation	GO:0030855	5	1.11022e-16	6.31652	37	38	823	5339	HFDGene08696,HFDGene08697,HFDGene08698,HFDGene08699,HFDGene10191,HFDGene10194,HFDGene10192,HFDGene10193,HFDGene10198,HFDGene10199,HFDGene10196,HFDGene10197,HFDGene08721,HFDGene08704,HFDGene08706,HFDGene08707,HFDGene08708,HFDGene08709,HFDGene08700,HFDGene08701,HFDGene08702,HFDGene08703,HFDGene08715,HFDGene08719,HFDGene08710,HFDGene08711,HFDGene08712,HFDGene08713,HFDGene10208,HFDGene10202,HFDGene10…	1.10921e-14
Biological process	germ cell development	GO:0007281	5	1.11022e-16	5.88378	39	43	823	5339	HFDGene08696,HFDGene08697,HFDGene08698,HFDGene08699,HFDGene10191,HFDGene10194,HFDGene10192,HFDGene10193,HFDGene10198,HFDGene10199,HFDGene10196,HFDGene10197,HFDGene08721,HFDGene08704,HFDGene08706,HFDGene08707,HFDGene08708,HFDGene08709,HFDGene08700,HFDGene08701,HFDGene08702,HFDGene08703,HFDGene08715,HFDGene08719,HFDGene08710,HFDGene08711,HFDGene08712,HFDGene08713,HFDGene10208,HFDGene10202,HFDGene10…	1.10921e-14
Biological process	female gamete generation	GO:0007292	5	1.11022e-16	5.88378	39	43	823	5339	HFDGene08696,HFDGene08697,HFDGene08698,HFDGene08699,HFDGene10191,HFDGene10194,HFDGene10192,HFDGene10193,HFDGene10198,HFDGene10199,HFDGene10196,HFDGene10197,HFDGene08721,HFDGene08704,HFDGene08706,HFDGene08707,HFDGene08708,HFDGene08709,HFDGene08700,HFDGene08701,HFDGene08702,HFDGene08703,HFDGene08715,HFDGene08719,HFDGene08710,HFDGene08711,HFDGene08712,HFDGene08713,HFDGene10208,HFDGene10202,HFDGene10…	1.10921e-14
Biological process	chorion-containing eggshell formation	GO:0007304	5	1.11022e-16	6.31652	37	38	823	5339	HFDGene08696,HFDGene08697,HFDGene08698,HFDGene08699,HFDGene10191,HFDGene10194,HFDGene10192,HFDGene10193,HFDGene10198,HFDGene10199,HFDGene10196,HFDGene10197,HFDGene08721,HFDGene08704,HFDGene08706,HFDGene08707,HFDGene08708,HFDGene08709,HFDGene08700,HFDGene08701,HFDGene08702,HFDGene08703,HFDGene08715,HFDGene08719,HFDGene08710,HFDGene08711,HFDGene08712,HFDGene08713,HFDGene10208,HFDGene10202,HFDGene10…	1.10921e-14
Biological process	epithelium development	GO:0060429	5	4.44089e-16	5.85434	37	41	823	5339	HFDGene08696,HFDGene08697,HFDGene08698,HFDGene08699,HFDGene10191,HFDGene10194,HFDGene10192,HFDGene10193,HFDGene10198,HFDGene10199,HFDGene10196,HFDGene10197,HFDGene08721,HFDGene08704,HFDGene08706,HFDGene08707,HFDGene08708,HFDGene08709,HFDGene08700,HFDGene08701,HFDGene08702,HFDGene08703,HFDGene08715,HFDGene08719,HFDGene08710,HFDGene08711,HFDGene08712,HFDGene08713,HFDGene10208,HFDGene10202,HFDGene10…	1.95222e-14
Molecular function	peptidase activity, acting on L-amino acid peptides	GO:0070011	5	1.22125e-14	1.84364	142	493	1255	8033	HFDGene12758,HFDGene12757,HFDGene09105,HFDGene02930,HFDGene10540,HFDGene02929,HFDGene02928,HFDGene05171,HFDGene10535,HFDGene04727,HFDGene14529,HFDGene14959,HFDGene03824,HFDGene02126,HFDGene03467,HFDGene14586,HFDGene02580,HFDGene11067,HFDGene06921,HFDGene03898,HFDGene06922,HFDGene12370,HFDGene14551,HFDGene02578,HFDGene02577,HFDGene12366,HFDGene10605,HFDGene15061,HFDGene17236,HFDGene16378,HFDGene16…	6.99774e-13
Molecular function	hydrolase activity, hydrolyzing O-glycosyl compounds	GO:0004553	5	7.12985e-12	2.8448	44	99	1255	8033	HFDGene05189,HFDGene06481,HFDGene06480,HFDGene09150,HFDGene09151,HFDGene14519,HFDGene11049,HFDGene14147,HFDGene11537,HFDGene11502,HFDGene10241,HFDGene11561,HFDGene04425,HFDGene07974,HFDGene11606,HFDGene11605,HFDGene12926,HFDGene12925,HFDGene11604,HFDGene11603,HFDGene12924,HFDGene00139,HFDGene00137,HFDGene00138,HFDGene16947,HFDGene13471,HFDGene13472,HFDGene13473,HFDGene00140,HFDGene00141,HFDGene04…	2.55338e-10
Molecular function	peroxidase activity	GO:0004601	5	3.69934e-06	3.429	15	28	1255	8033	HFDGene05656,HFDGene05657,HFDGene09213,HFDGene09210,HFDGene09211,HFDGene09212,HFDGene11545,HFDGene09209,HFDGene09257,HFDGene09258,HFDGene16915,HFDGene05933,HFDGene09004,HFDGene17096,HFDGene06856,	9.21617e-05
Biological process	drug catabolic process	GO:0042737	5	1.22873e-05	3.96443	11	18	823	5339	HFDGene10576,HFDGene14147,HFDGene00856,HFDGene03936,HFDGene06653,HFDGene07199,HFDGene16915,HFDGene07200,HFDGene06374,HFDGene14015,HFDGene16215,	0.000329359
Biological process	response to light stimulus	GO:0009416	5	1.40227e-05	5.67634	7	8	823	5339	HFDGene14573,HFDGene01791,HFDGene01790,HFDGene12415,HFDGene02205,HFDGene05365,HFDGene00978,	0.000366927
Molecular function	lipase activity	GO:0016298	5	0.000223318	2.20355	21	61	1255	8033	HFDGene07387,HFDGene07381,HFDGene07383,HFDGene08214,HFDGene10299,HFDGene10264,HFDGene10265,HFDGene10262,HFDGene01352,HFDGene08887,HFDGene01001,HFDGene11740,HFDGene02407,HFDGene02486,HFDGene04669,HFDGene04667,HFDGene04668,HFDGene05526,HFDGene14082,HFDGene14064,HFDGene14040,	0.00426537
Molecular function	ether hydrolase activity	GO:0016803	5	0.000482724	5.334	5	6	1255	8033	HFDGene15691,HFDGene15693,HFDGene15694,HFDGene01588,HFDGene13158,	0.00864378
Molecular function	peptidoglycan binding	GO:0042834	5	0.00147122	4.572	5	7	1255	8033	HFDGene00877,HFDGene10914,HFDGene10912,HFDGene10911,HFDGene10910,	0.0183263
Biological process	aminoglycan metabolic process	GO:0006022	5	0.00204452	3.05282	8	17	823	5339	HFDGene14147,HFDGene00877,HFDGene00872,HFDGene10914,HFDGene10912,HFDGene10909,HFDGene10911,HFDGene10910,	0.0374488
Biological process	organic acid catabolic process	GO:0016054	5	0.00257418	2.5949	10	25	823	5339	HFDGene09164,HFDGene04764,HFDGene04765,HFDGene04763,HFDGene04767,HFDGene14628,HFDGene03936,HFDGene06374,HFDGene14015,HFDGene16215,	0.0416033
Molecular function	UDP-glycosyltransferase activity	GO:0008194	5	0.0028932	2.04825	16	50	1255	8033	HFDGene03804,HFDGene03805,HFDGene00332,HFDGene03811,HFDGene03810,HFDGene03807,HFDGene02642,HFDGene02641,HFDGene13805,HFDGene13803,HFDGene13804,HFDGene11226,HFDGene15282,HFDGene14417,HFDGene13132,HFDGene13123,	0.0318808
Biological process	cellular modified amino acid metabolic process	GO:0006575	5	0.00297169	2.16241	14	42	823	5339	HFDGene12751,HFDGene14909,HFDGene11829,HFDGene11831,HFDGene11830,HFDGene03820,HFDGene03417,HFDGene06585,HFDGene14208,HFDGene04063,HFDGene04062,HFDGene05424,HFDGene15667,HFDGene10466,	0.0466555
Molecular function	G protein-coupled receptor activity	GO:0004930	5	0.00329644	1.6128	32	127	1255	8033	HFDGene09516,HFDGene05655,HFDGene07834,HFDGene01272,HFDGene02588,HFDGene14573,HFDGene02592,HFDGene07438,HFDGene13329,HFDGene03523,HFDGene01791,HFDGene01790,HFDGene12415,HFDGene12400,HFDGene13375,HFDGene02205,HFDGene07538,HFDGene05365,HFDGene16484,HFDGene03139,HFDGene17785,HFDGene03143,HFDGene15591,HFDGene09301,HFDGene00978,HFDGene07100,HFDGene00136,HFDGene08060,HFDGene10378,HFDGene07617,HFDGene11…	0.0349789
Molecular function	oxidoreductase activity, acting on the CH-CH group of donors, oxygen as acceptor	GO:0016634	5	0.00341849	4.0005	5	8	1255	8033	HFDGene04764,HFDGene04765,HFDGene04763,HFDGene04767,HFDGene14628,	0.0356145
Biological process	response to other organism	GO:0051707	5	0.00356367	2.37866	11	30	823	5339	HFDGene01662,HFDGene00877,HFDGene17366,HFDGene09717,HFDGene17380,HFDGene13420,HFDGene13421,HFDGene10914,HFDGene10912,HFDGene10911,HFDGene10910,	0.0543954
Molecular function	channel activity	GO:0015267	5	0.00383178	1.52214	39	164	1255	8033	HFDGene01625,HFDGene01626,HFDGene10565,HFDGene00738,HFDGene11868,HFDGene14524,HFDGene01638,HFDGene01637,HFDGene02146,HFDGene14568,HFDGene11910,HFDGene15495,HFDGene06141,HFDGene12807,HFDGene12809,HFDGene12802,HFDGene14657,HFDGene17707,HFDGene16491,HFDGene00974,HFDGene08424,HFDGene04941,HFDGene04942,HFDGene03608,HFDGene01053,HFDGene01033,HFDGene00194,HFDGene03688,HFDGene04506,HFDGene01482,HFDGene10…	0.0372137
Molecular function	endopeptidase regulator activity	GO:0061135	5	0.00755297	1.92024	15	50	1255	8033	HFDGene09573,HFDGene09568,HFDGene03439,HFDGene03437,HFDGene03436,HFDGene03995,HFDGene03997,HFDGene04801,HFDGene02439,HFDGene15701,HFDGene01521,HFDGene01524,HFDGene13155,HFDGene14447,HFDGene11804,	0.0636449
Molecular function	vitamin B6 binding	GO:0070279	5	0.0115599	2.07085	11	34	1255	8033	HFDGene09164,HFDGene05638,HFDGene05636,HFDGene03890,HFDGene06585,HFDGene12462,HFDGene00934,HFDGene15718,HFDGene08645,HFDGene04294,HFDGene05573,	0.0919976
Molecular function	glutamate receptor activity	GO:0008066	5	0.014591	2.4892	7	18	1255	8033	HFDGene01625,HFDGene01626,HFDGene01638,HFDGene01637,HFDGene17707,HFDGene01482,HFDGene16165,	0.110008
Biological process	carbohydrate derivative catabolic process	GO:1901136	5	0.0161435	2.16241	9	27	823	5339	HFDGene10576,HFDGene14147,HFDGene00877,HFDGene00872,HFDGene10914,HFDGene10912,HFDGene10909,HFDGene10911,HFDGene10910,	0.199345
Biological process	lipid catabolic process	GO:0016042	5	0.0186394	2.39004	7	19	823	5339	HFDGene04764,HFDGene04765,HFDGene04763,HFDGene04767,HFDGene14628,HFDGene12885,HFDGene01001,	0.225107
Molecular function	oxidoreductase activity, acting on the CH-OH group of donors, NAD or NADP as acceptor	GO:0016616	5	0.0195633	1.8734	12	41	1255	8033	HFDGene13636,HFDGene05614,HFDGene17217,HFDGene06548,HFDGene02273,HFDGene10311,HFDGene06717,HFDGene09402,HFDGene11796,HFDGene11795,HFDGene15338,HFDGene15339,	0.133449
Molecular function	peptidase inhibitor activity	GO:0030414	5	0.022314	1.6789	16	61	1255	8033	HFDGene09573,HFDGene09568,HFDGene03439,HFDGene03437,HFDGene03436,HFDGene03995,HFDGene03997,HFDGene04801,HFDGene07256,HFDGene02439,HFDGene15701,HFDGene01521,HFDGene01524,HFDGene13155,HFDGene14447,HFDGene11804,	0.150423
Biological process	oxoacid metabolic process	GO:0043436	5	0.0226227	1.37947	37	174	823	5339	HFDGene09164,HFDGene13636,HFDGene09111,HFDGene02127,HFDGene04764,HFDGene04765,HFDGene04763,HFDGene04767,HFDGene03890,HFDGene06585,HFDGene06548,HFDGene05691,HFDGene05673,HFDGene10660,HFDGene10658,HFDGene12472,HFDGene12462,HFDGene01795,HFDGene09288,HFDGene14628,HFDGene03936,HFDGene02273,HFDGene13384,HFDGene02697,HFDGene07192,HFDGene08020,HFDGene15660,HFDGene07205,HFDGene17063,HFDGene09402,HFDGene06…	0.267337
Molecular function	transaminase activity	GO:0008483	5	0.0398661	2.46184	5	13	1255	8033	HFDGene05638,HFDGene05636,HFDGene00934,HFDGene04294,HFDGene05573,	0.209572
Biological process	columnar/cuboidal epithelial cell differentiation	GO:0002065	6	1.11022e-16	6.31652	37	38	823	5339	HFDGene08696,HFDGene08697,HFDGene08698,HFDGene08699,HFDGene10191,HFDGene10194,HFDGene10192,HFDGene10193,HFDGene10198,HFDGene10199,HFDGene10196,HFDGene10197,HFDGene08721,HFDGene08704,HFDGene08706,HFDGene08707,HFDGene08708,HFDGene08709,HFDGene08700,HFDGene08701,HFDGene08702,HFDGene08703,HFDGene08715,HFDGene08719,HFDGene08710,HFDGene08711,HFDGene08712,HFDGene08713,HFDGene10208,HFDGene10202,HFDGene10…	1.10921e-14
Biological process	columnar/cuboidal epithelial cell development	GO:0002066	6	1.11022e-16	6.31652	37	38	823	5339	HFDGene08696,HFDGene08697,HFDGene08698,HFDGene08699,HFDGene10191,HFDGene10194,HFDGene10192,HFDGene10193,HFDGene10198,HFDGene10199,HFDGene10196,HFDGene10197,HFDGene08721,HFDGene08704,HFDGene08706,HFDGene08707,HFDGene08708,HFDGene08709,HFDGene08700,HFDGene08701,HFDGene08702,HFDGene08703,HFDGene08715,HFDGene08719,HFDGene08710,HFDGene08711,HFDGene08712,HFDGene08713,HFDGene10208,HFDGene10202,HFDGene10…	1.10921e-14
Biological process	oogenesis	GO:0048477	6	1.11022e-16	5.88378	39	43	823	5339	HFDGene08696,HFDGene08697,HFDGene08698,HFDGene08699,HFDGene10191,HFDGene10194,HFDGene10192,HFDGene10193,HFDGene10198,HFDGene10199,HFDGene10196,HFDGene10197,HFDGene08721,HFDGene08704,HFDGene08706,HFDGene08707,HFDGene08708,HFDGene08709,HFDGene08700,HFDGene08701,HFDGene08702,HFDGene08703,HFDGene08715,HFDGene08719,HFDGene08710,HFDGene08711,HFDGene08712,HFDGene08713,HFDGene10208,HFDGene10202,HFDGene10…	1.10921e-14
Molecular function	serine-type peptidase activity	GO:0008236	6	3.33067e-16	2.68249	101	241	1255	8033	HFDGene09105,HFDGene02930,HFDGene10540,HFDGene02929,HFDGene02928,HFDGene05171,HFDGene04727,HFDGene14529,HFDGene03824,HFDGene02126,HFDGene02580,HFDGene03898,HFDGene12370,HFDGene02578,HFDGene02577,HFDGene12366,HFDGene10605,HFDGene16378,HFDGene16377,HFDGene07886,HFDGene04371,HFDGene09658,HFDGene02644,HFDGene02645,HFDGene02658,HFDGene02657,HFDGene02603,HFDGene14244,HFDGene14241,HFDGene14242,HFDGene14…	3.18079e-14
Molecular function	endopeptidase activity	GO:0004175	6	2.86449e-12	1.9431	102	336	1255	8033	HFDGene09105,HFDGene02930,HFDGene10540,HFDGene02929,HFDGene02928,HFDGene05171,HFDGene04727,HFDGene14529,HFDGene03824,HFDGene02126,HFDGene03467,HFDGene02580,HFDGene11067,HFDGene03898,HFDGene12370,HFDGene14551,HFDGene02578,HFDGene02577,HFDGene12366,HFDGene10605,HFDGene17236,HFDGene16378,HFDGene16377,HFDGene07886,HFDGene04371,HFDGene09658,HFDGene02644,HFDGene02645,HFDGene02658,HFDGene02657,HFDGene02…	1.17239e-10
Biological process	proteolysis	GO:0006508	6	8.48466e-12	1.68716	142	546	823	5339	HFDGene09105,HFDGene02930,HFDGene10540,HFDGene02929,HFDGene02928,HFDGene05171,HFDGene10535,HFDGene04727,HFDGene14529,HFDGene03824,HFDGene02126,HFDGene03467,HFDGene14586,HFDGene02580,HFDGene11067,HFDGene06921,HFDGene03898,HFDGene06922,HFDGene12370,HFDGene14551,HFDGene02578,HFDGene02577,HFDGene12366,HFDGene10605,HFDGene15061,HFDGene17236,HFDGene16378,HFDGene16377,HFDGene07886,HFDGene04371,HFDGene06…	3.21539e-10
Biological process	detection of light stimulus	GO:0009583	6	2.02385e-06	6.48724	7	7	823	5339	HFDGene14573,HFDGene01791,HFDGene01790,HFDGene12415,HFDGene02205,HFDGene05365,HFDGene00978,	6.17835e-05
Molecular function	exopeptidase activity	GO:0008238	6	0.000292839	2.04825	24	75	1255	8033	HFDGene12758,HFDGene12757,HFDGene10535,HFDGene14959,HFDGene14586,HFDGene06921,HFDGene06922,HFDGene15061,HFDGene06198,HFDGene06196,HFDGene06195,HFDGene06194,HFDGene01324,HFDGene01326,HFDGene01325,HFDGene11114,HFDGene10708,HFDGene12097,HFDGene12099,HFDGene10329,HFDGene10328,HFDGene08451,HFDGene15229,HFDGene06792,	0.00541281
Biological process	sensory perception of light stimulus	GO:0050953	6	0.000376606	4.12824	7	11	823	5339	HFDGene14573,HFDGene01791,HFDGene01790,HFDGene12415,HFDGene02205,HFDGene05365,HFDGene00978,	0.00844673
Molecular function	cis-stilbene-oxide hydrolase activity	GO:0033961	6	0.000482724	5.334	5	6	1255	8033	HFDGene15691,HFDGene15693,HFDGene15694,HFDGene01588,HFDGene13158,	0.00864378
Molecular function	acyl-CoA oxidase activity	GO:0003997	6	0.000482724	5.334	5	6	1255	8033	HFDGene04764,HFDGene04765,HFDGene04763,HFDGene04767,HFDGene14628,	0.00864378
Biological process	aminoglycan catabolic process	GO:0006026	6	0.000721443	3.45986	8	15	823	5339	HFDGene14147,HFDGene00877,HFDGene00872,HFDGene10914,HFDGene10912,HFDGene10909,HFDGene10911,HFDGene10910,	0.0155464
Molecular function	flavin adenine dinucleotide binding	GO:0050660	6	0.000976241	1.84912	26	90	1255	8033	HFDGene02951,HFDGene14924,HFDGene09111,HFDGene14597,HFDGene04764,HFDGene04765,HFDGene04763,HFDGene04767,HFDGene14628,HFDGene15939,HFDGene15994,HFDGene15179,HFDGene16015,HFDGene16017,HFDGene16019,HFDGene09318,HFDGene16063,HFDGene16045,HFDGene01456,HFDGene03622,HFDGene15660,HFDGene02809,HFDGene15321,HFDGene10973,HFDGene10975,HFDGene10974,	0.0139847
Molecular function	lysozyme activity	GO:0003796	6	0.00171012	3.84048	6	10	1255	8033	HFDGene06481,HFDGene06480,HFDGene12926,HFDGene12925,HFDGene12924,HFDGene06479,	0.0208489
Biological process	cellular lipid catabolic process	GO:0044242	6	0.00255892	3.24362	7	14	823	5339	HFDGene04764,HFDGene04765,HFDGene04763,HFDGene04767,HFDGene14628,HFDGene12885,HFDGene01001,	0.044639
Molecular function	N-acetylmuramoyl-L-alanine amidase activity	GO:0008745	6	0.00278455	3.2004	7	14	1255	8033	HFDGene00877,HFDGene00872,HFDGene10914,HFDGene10912,HFDGene10909,HFDGene10911,HFDGene10910,	0.0319109
Biological process	G protein-coupled receptor signaling pathway	GO:0007186	6	0.00316016	1.57676	35	144	823	5339	HFDGene09516,HFDGene02545,HFDGene05655,HFDGene07834,HFDGene01272,HFDGene02588,HFDGene14573,HFDGene02592,HFDGene07438,HFDGene13329,HFDGene03523,HFDGene01791,HFDGene01790,HFDGene10275,HFDGene12415,HFDGene12400,HFDGene13375,HFDGene02205,HFDGene07538,HFDGene05365,HFDGene16484,HFDGene03139,HFDGene17785,HFDGene03143,HFDGene15591,HFDGene09301,HFDGene00978,HFDGene07100,HFDGene00136,HFDGene08060,HFDGene10…	0.0489157
Biological process	defense response to other organism	GO:0098542	6	0.00356367	2.37866	11	30	823	5339	HFDGene01662,HFDGene00877,HFDGene17366,HFDGene09717,HFDGene17380,HFDGene13420,HFDGene13421,HFDGene10914,HFDGene10912,HFDGene10911,HFDGene10910,	0.0543954
Molecular function	gated channel activity	GO:0022836	6	0.00409009	1.72606	24	89	1255	8033	HFDGene01625,HFDGene01626,HFDGene11868,HFDGene14524,HFDGene01638,HFDGene01637,HFDGene02146,HFDGene11910,HFDGene12807,HFDGene12809,HFDGene17707,HFDGene00974,HFDGene08424,HFDGene03608,HFDGene01053,HFDGene00194,HFDGene03688,HFDGene04506,HFDGene01482,HFDGene01954,HFDGene16165,HFDGene03742,HFDGene15762,HFDGene03301,	0.03842
Biological process	glycosaminoglycan metabolic process	GO:0030203	6	0.00643567	2.83817	7	16	823	5339	HFDGene00877,HFDGene00872,HFDGene10914,HFDGene10912,HFDGene10909,HFDGene10911,HFDGene10910,	0.0862537
Cellular component	microbody	GO:0042579	6	0.00700306	2.81719	7	17	436	2983	HFDGene04764,HFDGene04765,HFDGene04763,HFDGene04767,HFDGene14628,HFDGene05873,HFDGene05872,	0.128389
Molecular function	metallopeptidase activity	GO:0008237	6	0.00705212	1.55019	31	128	1255	8033	HFDGene12758,HFDGene12757,HFDGene10535,HFDGene14959,HFDGene03467,HFDGene14586,HFDGene06921,HFDGene06922,HFDGene14551,HFDGene15061,HFDGene06198,HFDGene06196,HFDGene06195,HFDGene06194,HFDGene00837,HFDGene00822,HFDGene00834,HFDGene00835,HFDGene00830,HFDGene00829,HFDGene01324,HFDGene01326,HFDGene01325,HFDGene11114,HFDGene12097,HFDGene12099,HFDGene08451,HFDGene15229,HFDGene06792,HFDGene01917,HFDGene01…	0.0603114
Molecular function	endopeptidase inhibitor activity	GO:0004866	6	0.00755297	1.92024	15	50	1255	8033	HFDGene09573,HFDGene09568,HFDGene03439,HFDGene03437,HFDGene03436,HFDGene03995,HFDGene03997,HFDGene04801,HFDGene02439,HFDGene15701,HFDGene01521,HFDGene01524,HFDGene13155,HFDGene14447,HFDGene11804,	0.0636449
Molecular function	ion channel activity	GO:0005216	6	0.00790656	1.48664	36	155	1255	8033	HFDGene01625,HFDGene01626,HFDGene10565,HFDGene00738,HFDGene11868,HFDGene14524,HFDGene01638,HFDGene01637,HFDGene02146,HFDGene14568,HFDGene11910,HFDGene15495,HFDGene06141,HFDGene12807,HFDGene12809,HFDGene12802,HFDGene17707,HFDGene16491,HFDGene00974,HFDGene08424,HFDGene04941,HFDGene04942,HFDGene03608,HFDGene01053,HFDGene03688,HFDGene04506,HFDGene01482,HFDGene10847,HFDGene04121,HFDGene15255,HFDGene01…	0.0647208
Molecular function	calcium ion binding	GO:0005509	6	0.00887999	1.45134	39	172	1255	8033	HFDGene13655,HFDGene06995,HFDGene16776,HFDGene16736,HFDGene03424,HFDGene05237,HFDGene11904,HFDGene11903,HFDGene11902,HFDGene14188,HFDGene05680,HFDGene08329,HFDGene08330,HFDGene12807,HFDGene04802,HFDGene09269,HFDGene10243,HFDGene15919,HFDGene03597,HFDGene12911,HFDGene12910,HFDGene07158,HFDGene09301,HFDGene02782,HFDGene12107,HFDGene04985,HFDGene15643,HFDGene08513,HFDGene07660,HFDGene01954,HFDGene03…	0.0716653
Molecular function	pyridoxal phosphate binding	GO:0030170	6	0.0115599	2.07085	11	34	1255	8033	HFDGene09164,HFDGene05638,HFDGene05636,HFDGene03890,HFDGene06585,HFDGene12462,HFDGene00934,HFDGene15718,HFDGene08645,HFDGene04294,HFDGene05573,	0.0919976
Molecular function	NAD binding	GO:0051287	6	0.0160929	2.06477	10	31	1255	8033	HFDGene13636,HFDGene17217,HFDGene06548,HFDGene02273,HFDGene02253,HFDGene12952,HFDGene06717,HFDGene09402,HFDGene11796,HFDGene11795,	0.116725
Biological process	ion transmembrane transport	GO:0034220	6	0.0210786	1.46486	28	124	823	5339	HFDGene08249,HFDGene10565,HFDGene08686,HFDGene11849,HFDGene11847,HFDGene14524,HFDGene06086,HFDGene02146,HFDGene14568,HFDGene06141,HFDGene12807,HFDGene12809,HFDGene12802,HFDGene01329,HFDGene02274,HFDGene14248,HFDGene05797,HFDGene00974,HFDGene04941,HFDGene04942,HFDGene03608,HFDGene01053,HFDGene03688,HFDGene04506,HFDGene10847,HFDGene01954,HFDGene03742,HFDGene03338,	0.251797
Biological process	carboxylic acid metabolic process	GO:0019752	6	0.0226227	1.37947	37	174	823	5339	HFDGene09164,HFDGene13636,HFDGene09111,HFDGene02127,HFDGene04764,HFDGene04765,HFDGene04763,HFDGene04767,HFDGene03890,HFDGene06585,HFDGene06548,HFDGene05691,HFDGene05673,HFDGene10660,HFDGene10658,HFDGene12472,HFDGene12462,HFDGene01795,HFDGene09288,HFDGene14628,HFDGene03936,HFDGene02273,HFDGene13384,HFDGene02697,HFDGene07192,HFDGene08020,HFDGene15660,HFDGene07205,HFDGene17063,HFDGene09402,HFDGene06…	0.267337
Biological process	regulation of mitotic cell cycle	GO:0007346	6	0.0264624	2.43272	6	16	823	5339	HFDGene13288,HFDGene09202,HFDGene00056,HFDGene11248,HFDGene10458,HFDGene06861,	0.266809
Molecular function	serine-type endopeptidase activity	GO:0004252	7	1.11022e-16	2.73062	93	218	1255	8033	HFDGene09105,HFDGene02930,HFDGene10540,HFDGene02929,HFDGene02928,HFDGene05171,HFDGene04727,HFDGene14529,HFDGene03824,HFDGene02126,HFDGene02580,HFDGene03898,HFDGene12370,HFDGene02578,HFDGene02577,HFDGene12366,HFDGene10605,HFDGene16378,HFDGene16377,HFDGene07886,HFDGene04371,HFDGene09658,HFDGene02644,HFDGene02645,HFDGene02658,HFDGene02657,HFDGene02603,HFDGene14244,HFDGene14241,HFDGene14242,HFDGene14…	1.59039e-14
Biological process	ovarian follicle cell development	GO:0030707	7	1.11022e-16	6.31652	37	38	823	5339	HFDGene08696,HFDGene08697,HFDGene08698,HFDGene08699,HFDGene10191,HFDGene10194,HFDGene10192,HFDGene10193,HFDGene10198,HFDGene10199,HFDGene10196,HFDGene10197,HFDGene08721,HFDGene08704,HFDGene08706,HFDGene08707,HFDGene08708,HFDGene08709,HFDGene08700,HFDGene08701,HFDGene08702,HFDGene08703,HFDGene08715,HFDGene08719,HFDGene08710,HFDGene08711,HFDGene08712,HFDGene08713,HFDGene10208,HFDGene10202,HFDGene10…	1.10921e-14
Molecular function	iron ion binding	GO:0005506	7	3.29137e-12	2.60956	53	130	1255	8033	HFDGene12751,HFDGene12753,HFDGene12752,HFDGene02951,HFDGene09176,HFDGene16717,HFDGene16714,HFDGene02559,HFDGene02558,HFDGene09182,HFDGene09169,HFDGene09168,HFDGene09130,HFDGene12788,HFDGene12789,HFDGene00785,HFDGene16757,HFDGene02564,HFDGene17675,HFDGene07492,HFDGene12457,HFDGene12459,HFDGene03931,HFDGene04427,HFDGene04428,HFDGene17741,HFDGene17739,HFDGene17736,HFDGene05314,HFDGene13848,HFDGene16…	1.2573e-10
Biological process	visual perception	GO:0007601	7	2.02385e-06	6.48724	7	7	823	5339	HFDGene14573,HFDGene01791,HFDGene01790,HFDGene12415,HFDGene02205,HFDGene05365,HFDGene00978,	6.17835e-05
Biological process	phototransduction	GO:0007602	7	2.02385e-06	6.48724	7	7	823	5339	HFDGene14573,HFDGene01791,HFDGene01790,HFDGene12415,HFDGene02205,HFDGene05365,HFDGene00978,	6.17835e-05
Molecular function	carboxypeptidase activity	GO:0004180	7	0.000159444	2.667	15	36	1255	8033	HFDGene14586,HFDGene06921,HFDGene06922,HFDGene15061,HFDGene06198,HFDGene06196,HFDGene06195,HFDGene06194,HFDGene11114,HFDGene10708,HFDGene12097,HFDGene12099,HFDGene10329,HFDGene10328,HFDGene06792,	0.00315039
Molecular function	serine-type endopeptidase inhibitor activity	GO:0004867	7	0.000622229	2.4003	15	40	1255	8033	HFDGene09573,HFDGene09568,HFDGene03439,HFDGene03437,HFDGene03436,HFDGene03995,HFDGene03997,HFDGene04801,HFDGene02439,HFDGene15701,HFDGene01521,HFDGene01524,HFDGene13155,HFDGene14447,HFDGene11804,	0.00963614
Molecular function	FAD binding	GO:0071949	7	0.00103093	2.70803	11	26	1255	8033	HFDGene02951,HFDGene14924,HFDGene09111,HFDGene04764,HFDGene04765,HFDGene04763,HFDGene04767,HFDGene14628,HFDGene03622,HFDGene15660,HFDGene02809,	0.0144079
Biological process	lipid oxidation	GO:0034440	7	0.00137701	4.63374	5	7	823	5339	HFDGene04764,HFDGene04765,HFDGene04763,HFDGene04767,HFDGene14628,	0.0280248
Molecular function	ligand-gated channel activity	GO:0022834	7	0.00140105	2.02692	19	60	1255	8033	HFDGene01625,HFDGene01626,HFDGene14524,HFDGene01638,HFDGene01637,HFDGene02146,HFDGene12807,HFDGene12809,HFDGene17707,HFDGene00974,HFDGene08424,HFDGene03608,HFDGene01053,HFDGene03688,HFDGene04506,HFDGene01482,HFDGene16165,HFDGene03742,HFDGene15762,	0.0186698
Biological process	peptidoglycan metabolic process	GO:0000270	7	0.00255892	3.24362	7	14	823	5339	HFDGene00877,HFDGene00872,HFDGene10914,HFDGene10912,HFDGene10909,HFDGene10911,HFDGene10910,	0.044639
Biological process	glycosaminoglycan catabolic process	GO:0006027	7	0.00255892	3.24362	7	14	823	5339	HFDGene00877,HFDGene00872,HFDGene10914,HFDGene10912,HFDGene10909,HFDGene10911,HFDGene10910,	0.044639
Biological process	glutathione metabolic process	GO:0006749	7	0.00256184	2.359	12	33	823	5339	HFDGene14909,HFDGene11829,HFDGene11831,HFDGene11830,HFDGene03820,HFDGene03417,HFDGene14208,HFDGene04063,HFDGene04062,HFDGene05424,HFDGene15667,HFDGene10466,	0.0420218
Biological process	carboxylic acid catabolic process	GO:0046395	7	0.00257418	2.5949	10	25	823	5339	HFDGene09164,HFDGene04764,HFDGene04765,HFDGene04763,HFDGene04767,HFDGene14628,HFDGene03936,HFDGene06374,HFDGene14015,HFDGene16215,	0.0416033
Molecular function	metalloexopeptidase activity	GO:0008235	7	0.0028932	2.04825	16	50	1255	8033	HFDGene12758,HFDGene12757,HFDGene14959,HFDGene14586,HFDGene06921,HFDGene06922,HFDGene15061,HFDGene06198,HFDGene06196,HFDGene06195,HFDGene06194,HFDGene11114,HFDGene12097,HFDGene12099,HFDGene15229,HFDGene06792,	0.0318808
Biological process	innate immune response	GO:0045087	7	0.00528252	3.24362	6	12	823	5339	HFDGene00877,HFDGene09717,HFDGene10914,HFDGene10912,HFDGene10911,HFDGene10910,	0.0716727
Molecular function	ion gated channel activity	GO:0022839	7	0.00634261	1.69216	23	87	1255	8033	HFDGene01625,HFDGene01626,HFDGene11868,HFDGene14524,HFDGene01638,HFDGene01637,HFDGene02146,HFDGene11910,HFDGene12807,HFDGene12809,HFDGene17707,HFDGene00974,HFDGene08424,HFDGene03608,HFDGene01053,HFDGene03688,HFDGene04506,HFDGene01482,HFDGene01954,HFDGene16165,HFDGene03742,HFDGene15762,HFDGene03301,	0.0576876
Cellular component	peroxisome	GO:0005777	7	0.00700306	2.81719	7	17	436	2983	HFDGene04764,HFDGene04765,HFDGene04763,HFDGene04767,HFDGene14628,HFDGene05873,HFDGene05872,	0.128389
Molecular function	peptidyl-dipeptidase activity	GO:0008241	7	0.0187325	2.90945	5	11	1255	8033	HFDGene10535,HFDGene01324,HFDGene01326,HFDGene01325,HFDGene08451,	0.129322
Biological process	alpha-amino acid metabolic process	GO:1901605	8	0.000204667	2.45074	17	45	823	5339	HFDGene09164,HFDGene09111,HFDGene02127,HFDGene06585,HFDGene05673,HFDGene12472,HFDGene01795,HFDGene03936,HFDGene02697,HFDGene07192,HFDGene15660,HFDGene07205,HFDGene17063,HFDGene06374,HFDGene01993,HFDGene14015,HFDGene16215,	0.00478573
Molecular function	metallocarboxypeptidase activity	GO:0004181	8	0.000530758	2.7432	12	28	1255	8033	HFDGene14586,HFDGene06921,HFDGene06922,HFDGene15061,HFDGene06198,HFDGene06196,HFDGene06195,HFDGene06194,HFDGene11114,HFDGene12097,HFDGene12099,HFDGene06792,	0.00868926
Biological process	monocarboxylic acid catabolic process	GO:0072329	8	0.00137701	4.63374	5	7	823	5339	HFDGene04764,HFDGene04765,HFDGene04763,HFDGene04767,HFDGene14628,	0.0280248
Molecular function	ligand-gated ion channel activity	GO:0015276	8	0.00140105	2.02692	19	60	1255	8033	HFDGene01625,HFDGene01626,HFDGene14524,HFDGene01638,HFDGene01637,HFDGene02146,HFDGene12807,HFDGene12809,HFDGene17707,HFDGene00974,HFDGene08424,HFDGene03608,HFDGene01053,HFDGene03688,HFDGene04506,HFDGene01482,HFDGene16165,HFDGene03742,HFDGene15762,	0.0186698
Biological process	peptidoglycan catabolic process	GO:0009253	8	0.00255892	3.24362	7	14	823	5339	HFDGene00877,HFDGene00872,HFDGene10914,HFDGene10912,HFDGene10909,HFDGene10911,HFDGene10910,	0.044639
Biological process	fatty acid metabolic process	GO:0006631	8	0.00477515	2.73147	8	19	823	5339	HFDGene04764,HFDGene04765,HFDGene04763,HFDGene04767,HFDGene06548,HFDGene14628,HFDGene13384,HFDGene09402,	0.0655986
Molecular function	transmitter-gated channel activity	GO:0022835	8	0.0176374	2.1336	9	27	1255	8033	HFDGene01625,HFDGene01626,HFDGene01638,HFDGene01637,HFDGene17707,HFDGene00974,HFDGene04506,HFDGene01482,HFDGene16165,	0.124769
Molecular function	extracellular ligand-gated ion channel activity	GO:0005230	9	0.000128868	2.53055	17	43	1255	8033	HFDGene01625,HFDGene01626,HFDGene14524,HFDGene01638,HFDGene01637,HFDGene02146,HFDGene12807,HFDGene12809,HFDGene17707,HFDGene00974,HFDGene03608,HFDGene01053,HFDGene03688,HFDGene04506,HFDGene01482,HFDGene16165,HFDGene03742,	0.00263719
Biological process	fatty acid catabolic process	GO:0009062	9	0.00137701	4.63374	5	7	823	5339	HFDGene04764,HFDGene04765,HFDGene04763,HFDGene04767,HFDGene14628,	0.0280248
Biological process	fatty acid oxidation	GO:0019395	9	0.00137701	4.63374	5	7	823	5339	HFDGene04764,HFDGene04765,HFDGene04763,HFDGene04767,HFDGene14628,	0.0280248
Biological process	glutamine family amino acid metabolic process	GO:0009064	9	0.00950947	2.67122	7	17	823	5339	HFDGene02127,HFDGene05673,HFDGene01795,HFDGene07192,HFDGene07205,HFDGene17063,HFDGene01993,	0.124416
Biological process	serine family amino acid metabolic process	GO:0009069	9	0.0176838	2.94875	5	11	823	5339	HFDGene06585,HFDGene12472,HFDGene03936,HFDGene14015,HFDGene16215,	0.215938
Biological process	fatty acid beta-oxidation	GO:0006635	10	0.00137701	4.63374	5	7	823	5339	HFDGene04764,HFDGene04765,HFDGene04763,HFDGene04767,HFDGene14628,	0.0280248
Molecular function	transmitter-gated ion channel activity	GO:0022824	10	0.0176374	2.1336	9	27	1255	8033	HFDGene01625,HFDGene01626,HFDGene01638,HFDGene01637,HFDGene17707,HFDGene00974,HFDGene04506,HFDGene01482,HFDGene16165,	0.124769
Biological process	glutamine family amino acid biosynthetic process	GO:0009084	10	0.0265418	2.70302	5	12	823	5339	HFDGene05673,HFDGene01795,HFDGene07205,HFDGene17063,HFDGene01993,	0.265177
Molecular function	ionotropic glutamate receptor activity	GO:0004970	11	0.014591	2.4892	7	18	1255	8033	HFDGene01625,HFDGene01626,HFDGene01638,HFDGene01637,HFDGene17707,HFDGene01482,HFDGene16165,	0.110008
